# Supplementary material for: Antioxidant-Enriched Diet on Oxidative Stress and Inflammation Gene Expression: A Randomized Controlled Trial
Source: MDPI journal article supplement (doi:10.3390/genes14010206), 2023-01-13
Supplement: s1 [file s1]

**Table S1.** Determination of nutritional parameters in MAB juice.

| <b>Nutrients (g/100 g)</b>  | <b>MAB juice</b> |
|-----------------------------|------------------|
| Energy value (kcal/kJ)      | 35/149           |
| Humidity                    | 91.03 ± 1.27     |
| Ash                         | 0.23 ± 0.01      |
| Sodium                      | <0.02 ± 0.00     |
| Salt                        | 0.002 ± 0.00     |
| Protein                     | 0.19 ± 0.01      |
| Fats                        | <0.1 ± 0.00      |
| Monounsaturated fatty acids | <0.1 ± 0.00      |
| Polyunsaturated fatty acids | <0.1 ± 0.00      |
| Saturated fatty acids       | <0.1 ± 0.00      |
| Carbohydrates of which:     | 8.55 ± 0.18      |
| Sugars                      | 8.55 ± 0.18      |
| Dietary fiber               | <0.5 ± 0.01      |

Data, which represent the average ± standard deviations (SD) of three independent experiments (n =3), were expressed as g/100 g of juice. Abbreviations: standard deviations (SD); mixed apple and bergamot juice (MAB juice).

**Table S2.** Functional properties of MAB juice.

| Compound                        | RT (min) | $\lambda_{\max}$ (nm) | [M-H] <sup>-</sup> | mg/L            |
|---------------------------------|----------|-----------------------|--------------------|-----------------|
| Procyanidin B1                  | 18.48    | 280                   | 577                | 4.40 ± 0.08     |
| <b>Chlorogenic acid</b>         | 20.29    | 326                   | 353                | 30.08 ± 0.25    |
| (+)-Catechin                    | 20.56    | 278                   | 289                | 3.04 ± 0.05     |
| <b>Procyanidin B2</b>           | 21.71    | 280                   | 577                | 30.96 ± 0.37    |
| Vicenin-2                       | 20.76    | 335                   | 593                | 7.72 ± 0.12     |
| Caffeic acid                    | 21.95    | 325                   | 179                | 3.84 ± 0.04     |
| <b>(-)-Epicatechin</b>          | 22.41    | 278                   | 289                | 37.28 ± 0.18    |
| <b>4-p-Cumaroylquinic acid</b>  | 22.87    | 312                   | 337                | 11.52 ± 0.15    |
| Stellarin-2                     | 23.94    | 347                   | 623                | 5.16 ± 0.05     |
| Quercetin-3-O-rhamnoside        | 29.57    | 350                   | 447                | 1.28 ± 0.02     |
| Phloretin-2'-O-xyloglucoside    | 30.03    | 284                   | 567                | 6.08 ± 0.04     |
| Phloridzin                      | 32.11    | 284                   | 435                | 3.28 ± 0.02     |
| <b>Neohesperidin</b>            | 32.89    | 285                   | 595                | 14.66 ± 0.22    |
| <b>Naringin</b>                 | 39.08    | 285                   | 579                | 33.50 ± 0.33    |
| Rhoifolin                       | 39.64    | 340                   | 577                | 9.28 ± 0.06     |
| Neodiosmin                      | 42.08    | 350                   | 607                | 4.62 ± 0.02     |
| Neohesperidin-di-oxalate        | 42.26    | 284                   | 739                | 4.02 ± 0.04     |
| <b>Neohesperidin</b>            | 42.82    | 285                   | 609                | 24.78 ± 0.38    |
| <b>Melitin</b>                  | 46.87    | 285                   | 707                | 85.24 ± 0.67    |
| <b>Naringin-di-oxalate</b>      | 47.69    | 284                   | 723                | 17.86 ± 0.16    |
| <b>Brutieridin</b>              | 47.92    | 285                   | 737                | 108.27 ± 1.44   |
| <b>Neohesperidin-di-oxalate</b> | 50.86    | 284                   | 753                | 38.00 ± 0.52    |
| Vitamin C (mg/L)                |          |                       |                    | 422.02 ± 1.88   |
| TPC (mg GAE/L)                  |          |                       |                    | 1263.16 ± 8.53  |
| TFC (mg QE/L)                   |          |                       |                    | 385.38 ± 2.66   |
| ORAC (μmoli TE/L)               |          |                       |                    | 5964.29 ± 12.48 |

Results are expressed as mean ± standard deviation of three independent experiments in triplicate ( $n=3$ ) for each parameter. Polyphenolic profile characterization and Vitamin C content were established by LC-DAD-ESI-MS and HPLC-DAD analysis, respectively. TPC, TFC, and ORAC value were quantified by spectrophotometric and spectrofluorimetric assays, respectively. The most abundant polyphenols were reported in bold. Abbreviations: total phenolic compound (TPC); gallic acid equivalents (GAE); total flavonoid compound (TFC); quercetin equivalents (QE); Oxygen radical absorbance capacity (ORAC); Trolox equivalents (TE).
